# Supplementary material for: Reduced graphene oxide–titania based platform for label-free biosensor
Source: Royal Society of Chemistry journal article supplement (doi:10.1039/c4ra09265a), 2014-01-01
Supplement: c4ra09265a1.pdf [file c4ra09265a1.pdf]

**Reduced Graphene Oxide-Titania based Platform for Label- Free  
Biosensor**

Pratima R. Solanki<sup>a,b\*</sup>, Saurabh Srivastava<sup>b,c</sup>, Md. Azahar Ali<sup>b</sup>, Rajesh Kr. Srivastava<sup>c</sup>, Anchal  
Srivastava,<sup>c</sup> B. D. Malhotra<sup>b,d\*</sup>

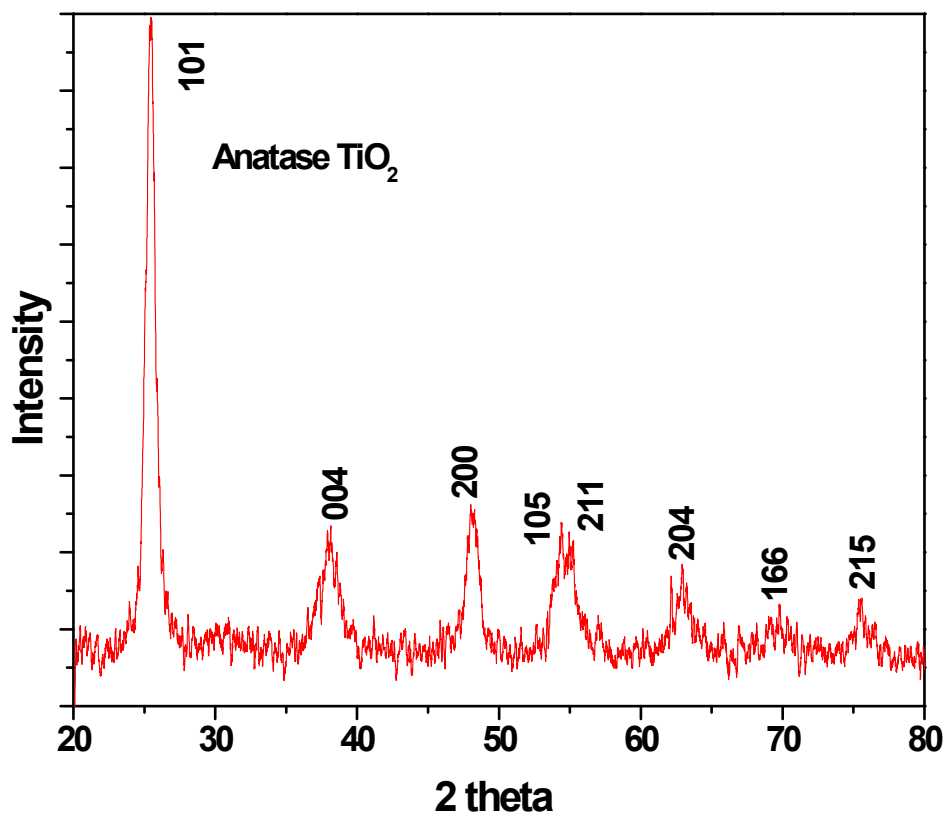

Figure S1 XRD of TiO<sub>2</sub> nanoparticles

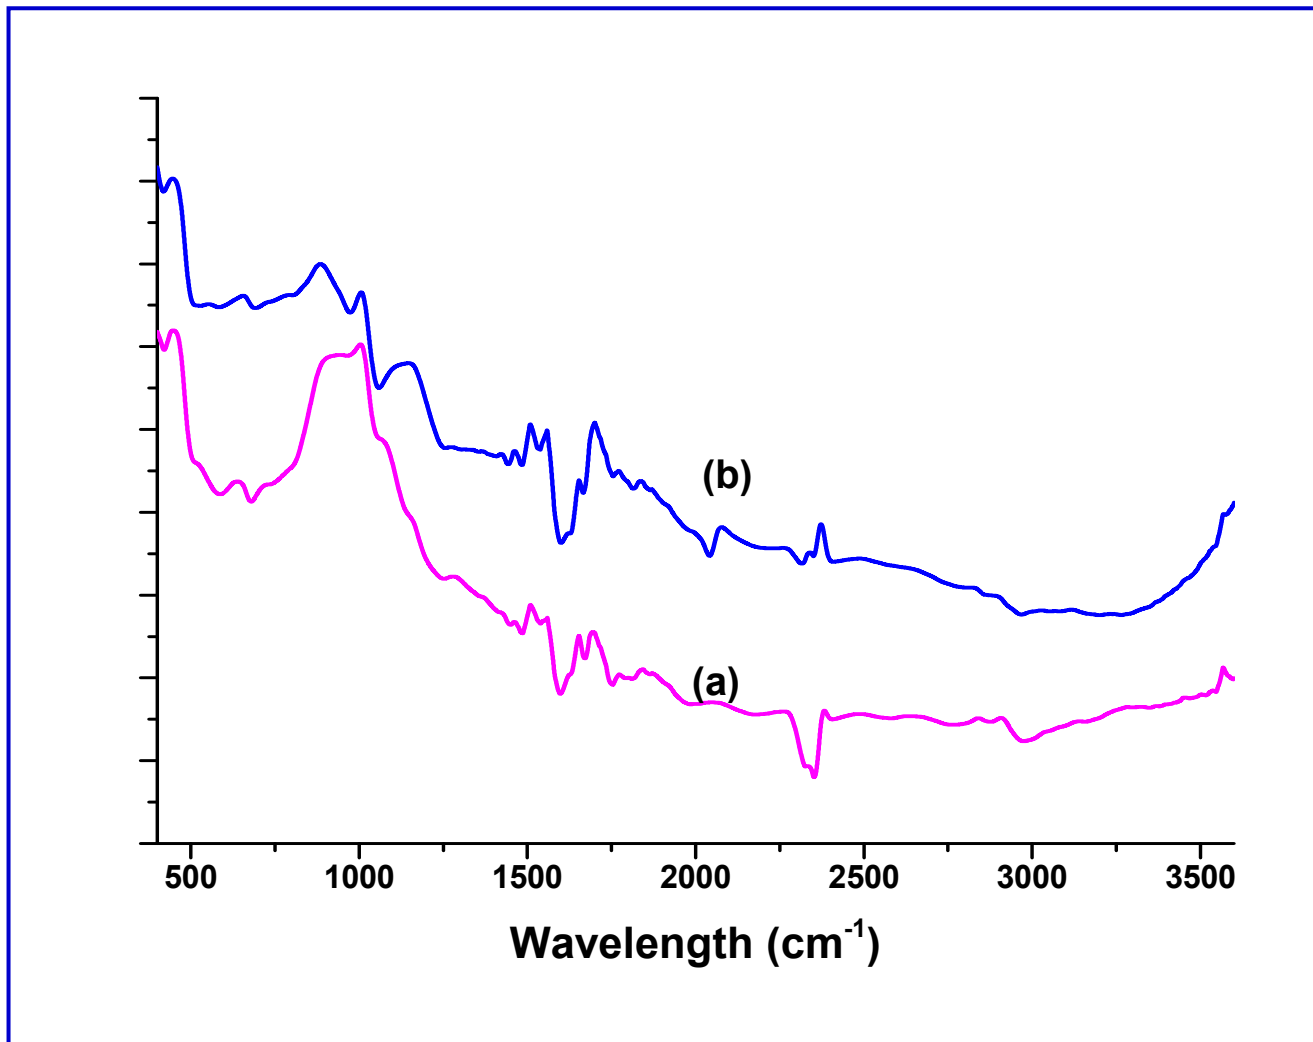

Figure S2. FT-IR spectra of RGO-antTiO<sub>2</sub>/ITO nanohybrid (a) and BSA/Ab-Vc/RGO-antTiO<sub>2</sub>/ITO immunoelectrode (b)

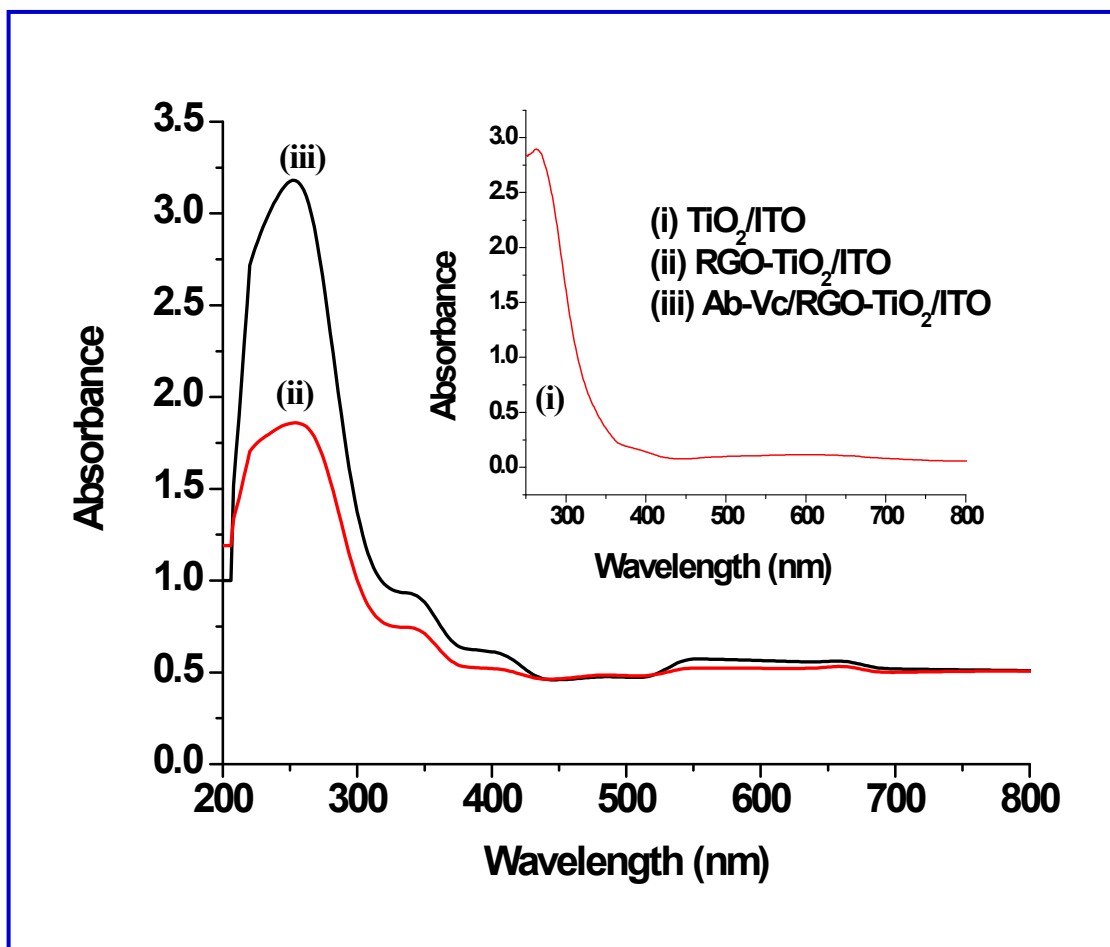

Figure S3. UV-visible spectra of RGO, RGO-antTiO<sub>2</sub> and Ab-Vc/RGO-antTiO<sub>2</sub> in aqueous solution.

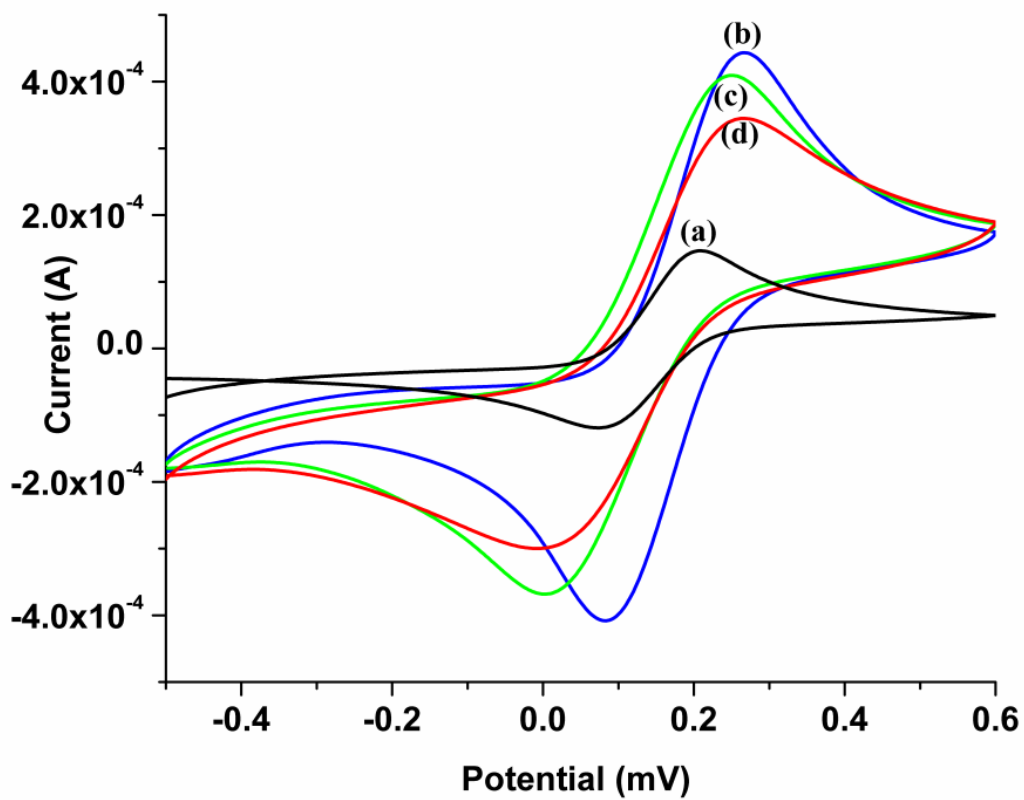

Figure S4. CV spectra of (a) ITO, (b) RGO-antTiO<sub>2</sub>/ITO nanohybrid, (c) Ab-Vc/RGO-antTiO<sub>2</sub>/ITO immunoelectrode and BSA/Ab-Vc/RGO-antTiO<sub>2</sub>/ITO bioelectrode.

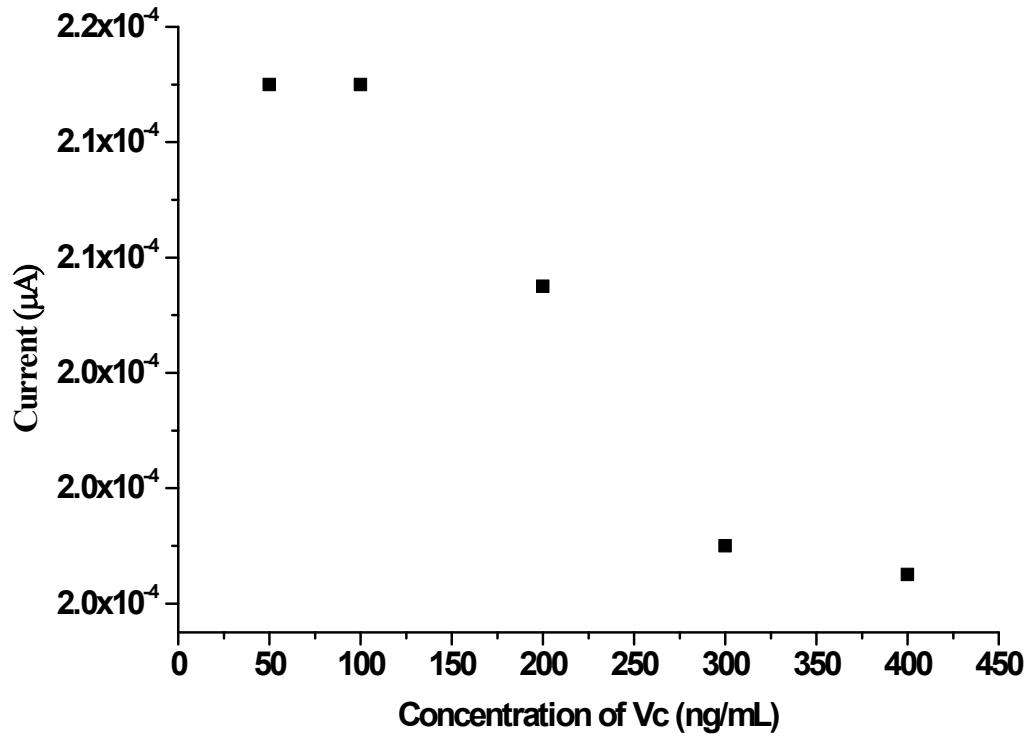

Figure S 5 Calibration plot between capacitance of the BSA/Ab-*Vc*/RGO/ITO immunoelectrode as a function of *Vibrio cholerae* concentration

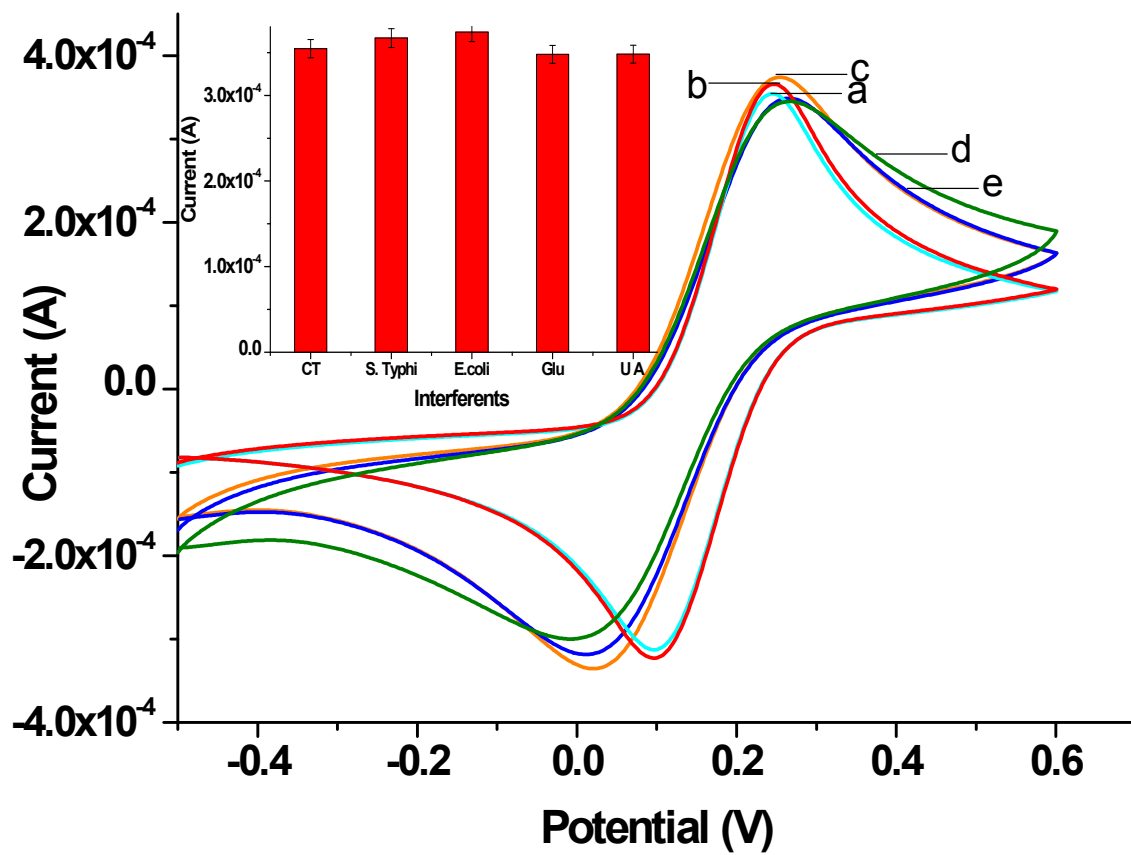

Figure S6. Interference studies of (a) BSA/Ab-Vc/RGO-antTiO<sub>2</sub>/ITO immunoelectrode (300 ng/ $\mu$ L) in presence of (b) *Escherichia coli* (300 ng/ml), (c) *Salmonella typhi* (300 ng/ml), (d) glucose (Glu), (e) uric acid (UA); inset shows the histogram plot with all interferents.

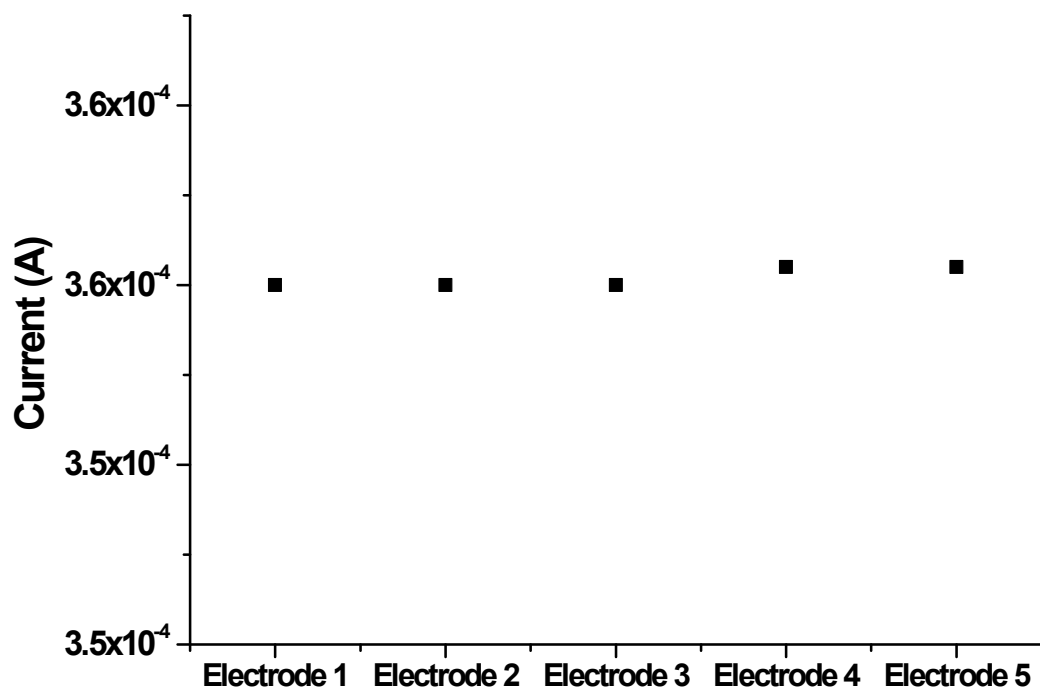

Figure S7. Reproducibility test for BSA/Ab-*Vc*/RGO-antTiO<sub>2</sub>/ITO immunoelectrode at 100 ng/mL of CT.



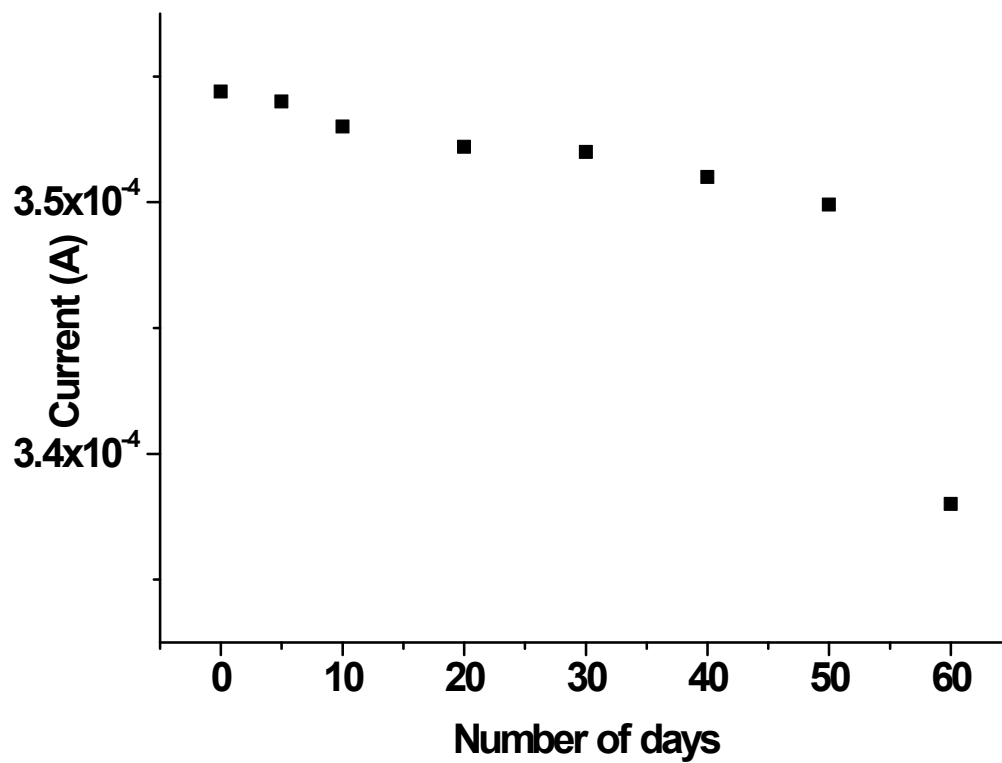

Figure S8. The stability curve of BSA/Ab-*Vc*/RGO-antTiO<sub>2</sub>/ITO immunoelectrode (100 ng/mL) for 0-60 days.

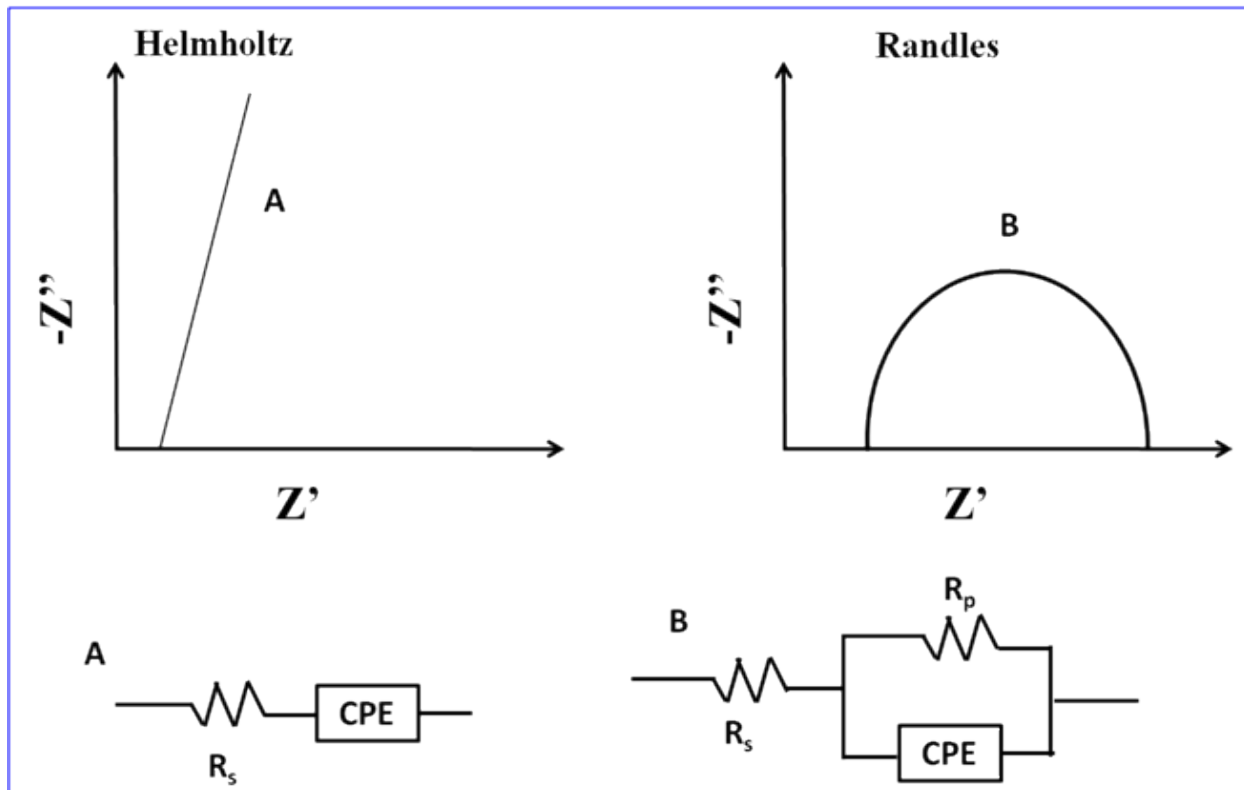

Scheme A Date representation of impedance spectra and Helmholtz equivalent circuit model and (B) impedance spectra and Randles equivalent circuit model
